# Supplementary material for: Melon13-lipoxygenase CmLOX18 may be involved in C6 volatiles biosynthesis in fruit
Source: PubMed Central journal article supplement (PMC5460189; doi:10.1038/s41598-017-02559-6), 2017-06-06
Supplement: 41598_2017_2559_MOESM1_ESM.pdf [file 41598_2017_2559_MOESM1_ESM.pdf]

**Melon13-lipoxygenase *CmLOX18* may be involved in  
C6 volatiles biosynthesis in fruit**

Chong Zhang<sup>1 2†</sup>, Song-xiao Cao<sup>1†</sup>, Ya-zhong Jin<sup>1 3†</sup>, Li-jun Ju<sup>1</sup>, Qiang  
Chen<sup>1 4</sup>, Qiao-juan Xing<sup>1</sup>, Hong-yan Qi<sup>1\*</sup>

<sup>1</sup>Key Laboratory of Protected Horticulture of Education Ministry and Liaoning Province, College of Horticulture, Shenyang Agricultural University, Collaborative Innovation Center of Protected Vegetable Surround Bohai Gulf region, Shenyang, Liaoning 110866, PR China

<sup>2</sup>College of Horticulture, Jilin Agricultural University, Changchun, PR China

<sup>3</sup>College of Agriculture, Heilongjiang Bayi Agricultural University, Daqing, Heilongjiang 163319, PR China.

<sup>4</sup> Experimental Center, Shenyang Normal University, Shenyang, Liaoning 110034, PR China

\*corresponding author: hyqiaaa@126.com

† These authors contributed equally to the work

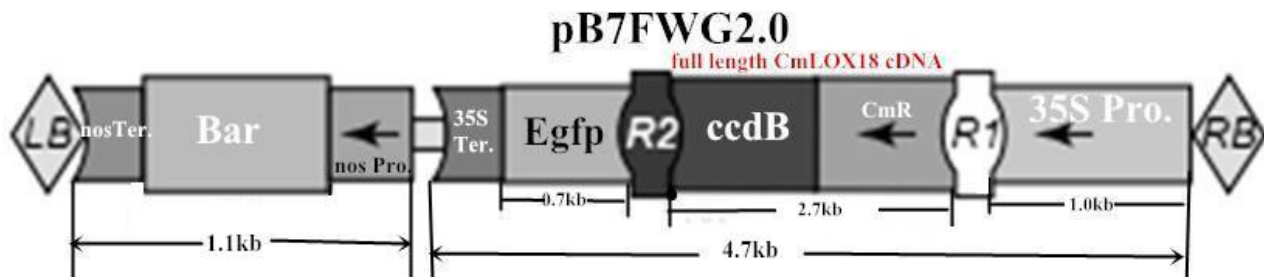

**Figure S1** Schematic diagram of pB7WG2.0/LOX construct.

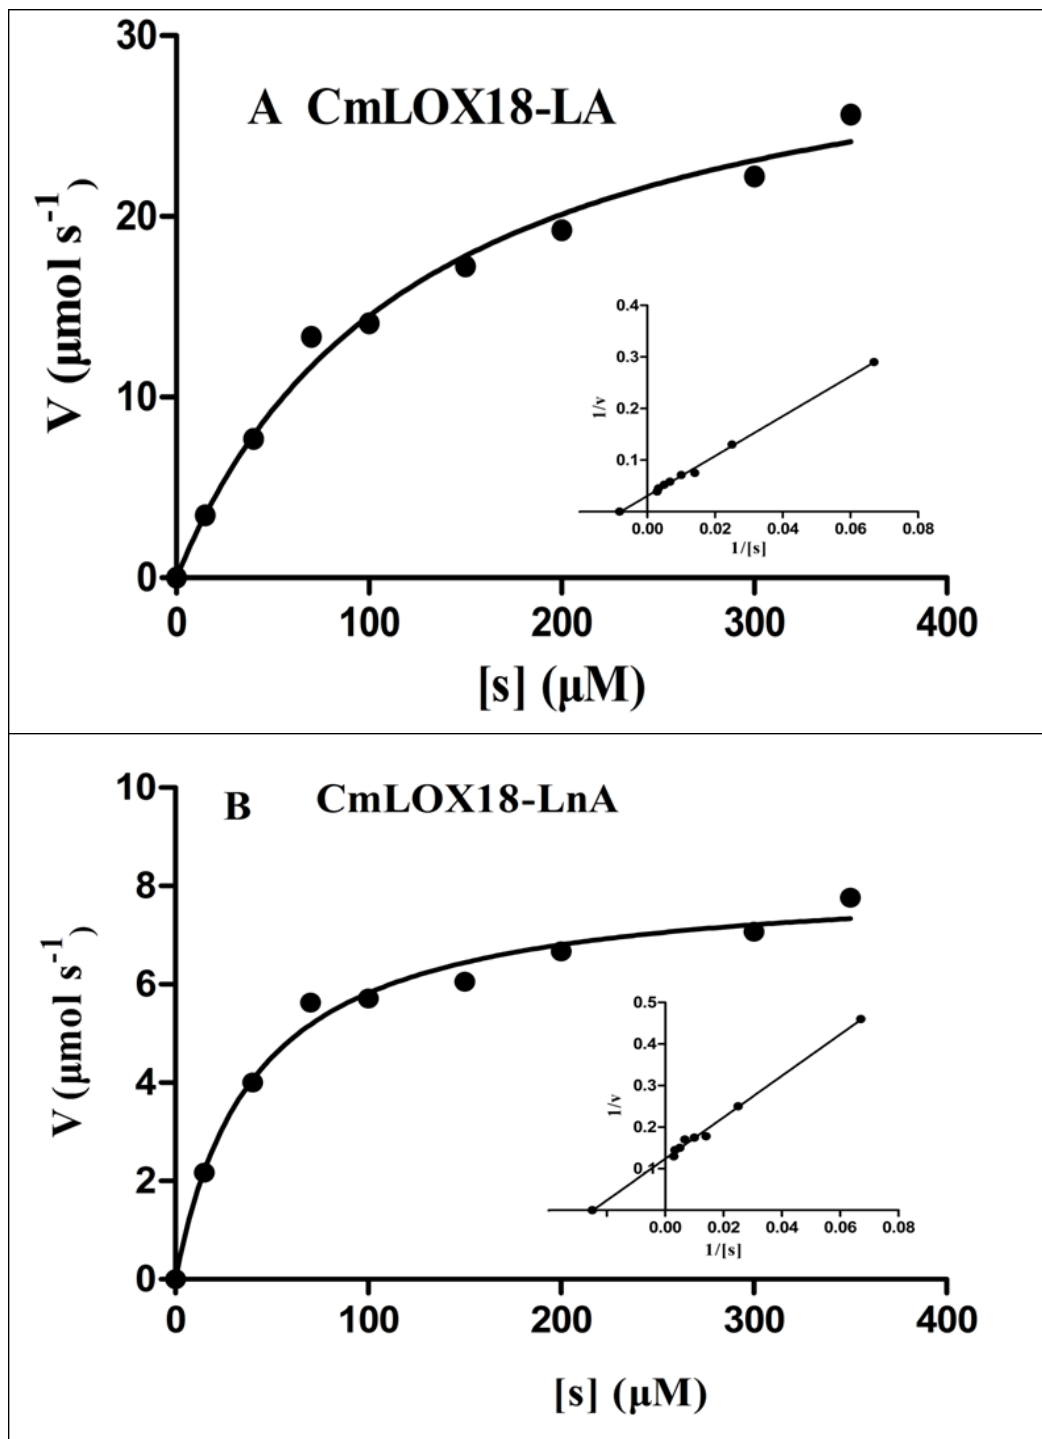

**Figure S2** Effect of substrate concentration, linoleic acid (LA) and linolenic acid (LNA) on CmLOX18 enzymatic activity. Inserts are Lineweaver-Burk plots.

**Table S1** Nucleotide sequences of primers used for PCR amplification in the present study.

| <b>Pimer name</b> | <b>Sequence (5' to 3')</b> |
|-------------------|----------------------------|
| <i>CmLOX18-F</i>  | TGGAGACTATCACAATCG         |
| <i>CmLOX18-R</i>  | CTTTCCCATCACCTCTAA         |
| <i>LeHPL-F</i>    | AGCTACGGATTGCCGTTAGT       |
| <i>LeHPL-R</i>    | TCCACCACCATAATCC           |
| <i>TomloxA-F</i>  | TACCTCCCAAATCGTCCCAC       |
| <i>TomloxA -R</i> | TGCGCTGTGATGGTTTTCAA       |
| <i>TomloxB-F</i>  | TGGCTTGGAATTTGGGCAG        |
| <i>TomloxB-R</i>  | TCTTGTCGCCATGTCCTTCT       |
| <i>TomloxC-F</i>  | GCAATGCATCATGTGTGCTA       |
| <i>TomloxC-R</i>  | GTAAATGTCGAATTCCCTTCG      |
| <i>TomloxD-F</i>  | GGCTTGCTTTACTCCTGGTC       |
| <i>TomloxD-R</i>  | AAATCAAAGCGCCAGTTCTT       |
| <i>TomloxE-F</i>  | AAGCCGGAAATTCATGCCAG       |
| <i>TomloxE-R</i>  | TTCCAACCAATGTCTGCAGC       |
| <i>TomloxF-F</i>  | CCGAATCAAAGGGTGACTTT       |
| <i>TomloxF-R</i>  | GGTCTGTGATGATCGATTGC       |
| <i>Actin-F</i>    | TATGGTCAAGGCTGGGTTCG       |
| <i>Actin-R</i>    | CCATGCTCGATGGGGTACTT       |

**Table S2** Overexpression CmLOX18 in fruits volatile compounds in wild type (“Zhongshu 6”) and transgenic (CM18-01, 03 and 04) ripe fruits.

| No                  | Aroma compounds       | WT      |      | CM18-01 |      | CM18-03 |       | CM18-04 |      |
|---------------------|-----------------------|---------|------|---------|------|---------|-------|---------|------|
|                     |                       | Breaker | B+7  | Breaker | B+7  | Breaker | B+7   | Breaker | B+7  |
| <b>Aldehydes(7)</b> |                       |         |      |         |      |         |       |         |      |
| 1                   | Hexanal               | 76.6    | 62.3 | 108.5   | 99.7 | 133.1   | 112.2 | 122     | 100  |
| 2                   | cis-3-Hexenal         | 32.1    | 22.1 | 64.7    | 44.6 | 70.4    | 55.4  | 65.9    | 60   |
| 3                   | 3-Furaldehyde         | 16.7    | 11.3 | 14.4    | 13.2 | 15.1    | 10.7  | 15.4    | 12.1 |
| 4                   | Heptanal              | 8.5     | 6.3  | 7.0     | 5.7  | 7.2     | 6.5   | 8.0     | 7.7  |
| 5                   | Benzaldehyde          | nd      | 0.5  | nd      | 0.4  | nd      | 0.7   | nd      | 0.6  |
| 6                   | phynylatablehyde      | 0.2     | 1.7  | 0.3     | 2.0  | nd      | 1.5   | 0.5     | 1.9  |
| 7                   | Citralcistrans        | nd      | 0.1  | nd      | nd   | nd      | 0.2   | nd      | nd   |
| <b>Alcohols(6)</b>  |                       |         |      |         |      |         |       |         |      |
| 8                   | 1-Pentanol            | 1.97    | 2.18 | 1.87    | 1.99 | 2.02    | 2.11  | 1.99    | 2.3  |
| 9                   | cis-3-Hexen-1-ol      | 15.7    | 19.7 | 30.7    | 38.9 | 33.8    | 45.5  | 31      | 47.2 |
| 10                  | 5-methyl-5-Hexen-1-ol | nd      | 0.18 | nd      | 0.1  | 0.5     | 0.35  | nd      | 0.2  |
| 11                  | 2-Heptyn-1-ol         | nd      | nd   | nd      | nd   | 1.7     | 1.7   | nd      | nd   |
| 12                  | Benezyl alcohol       | 0.12    | 0.88 | nd      | 0.54 | nd      | 0.81  | nd      | 0.66 |
| 13                  | Phenethyl alcohol     | nd      | 0.71 | nd      | 0.74 | nd      | 0.68  | nd      | 0.69 |
| <b>Acids(5)</b>     |                       |         |      |         |      |         |       |         |      |
| 14                  | Acetic acid           | 4.12    | 1.35 | 4.02    | 1.37 | 3.92    | 1.29  | 4.3     | 1.4  |

|                   |                            |      |       |      |      |      |       |      |       |
|-------------------|----------------------------|------|-------|------|------|------|-------|------|-------|
| 15                | Butanoic acid              | 0.2  | nd    | 0.1  | nd   | 0.1  | nd    | 0.1  | nd    |
| 16                | Hexanoic acid              | 1.21 | 0.62  | 1.22 | 0.70 | 1.18 | 0.63  | 1.29 | 0.72  |
| 17                | Octanoic acid              | 0.32 | 0.11  | 0.31 | 0.16 | 0.29 | 0.19  | 0.35 | 0.15  |
| 18                | Pentadecanoic acid         | 0.1  | nd    | 0.08 | nd   | 0.09 | nd    | 0.1  | nd    |
| <b>Ketones(4)</b> |                            |      |       |      |      |      |       |      |       |
| 19                | 1-Penten-3-one             | nd   | 1.22  | nd   | 1.44 | nd   | 1.5   | nd   | 0.9   |
| 20                | 6-Methyl-5-hepten-2-one    | nd   | 0.09  | nd   | 0.07 | nd   | nd    | nd   | 0.07  |
| 21                | Geranylacetone             | nd   | 0.087 | nd   | 0.09 | nd   | 0.065 | nd   | 0.076 |
| 22                | beta-lonone                | 1.11 | 3.01  | 1.4  | 3.2  | 1.2  | 3.3   | 1.4  | 2.99  |
| <b>Others(4)</b>  |                            |      |       |      |      |      |       |      |       |
| 23                | Birch-Me Methyl salicylate | nd   | 2.99  | nd   | 3.1  | nd   | 3.02  | nd   | 3.0   |
| 24                | Eugenol                    | 1.73 | 4.89  | 1.55 | 5.3  | 1.65 | 5.1   | 1.75 | 7.3   |
| 25                | 2-Isobutylthiazole         | 0.16 | nd    | 0.1  | 0.06 | 0.23 | nd    | 0.17 | 0.09  |
| 26                | Naphthalene                | 0.14 | 0.22  | 0.09 | 0.2  | 0.1  | 0.25  | 0.12 | 0.24  |

---
